# Supplementary material for: An artificial muscle model unit based on inorganic nanosheet sliding by photochemical reaction
Source: Royal Society of Chemistry journal article supplement (doi:10.1039/c3nr34308a), 2013-01-01
Supplement: c3nr34308a.pdf [file c3nr34308a.pdf]

Electronic supplementary information

ESI-1

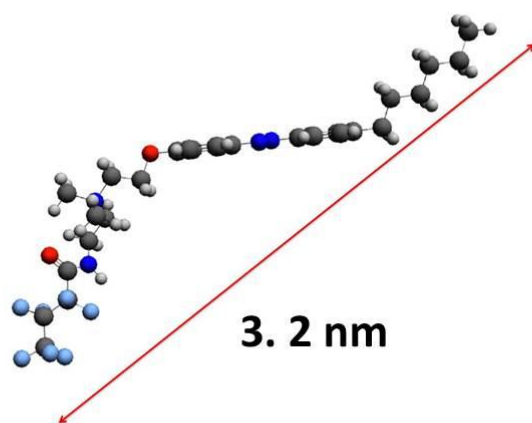

ESI-1 Molecular length of the C<sub>3</sub>F-Azo (3.2 nm) estimated by structural optimization by means of Gaussian09 (B3LYP/6-31G\*).

ESI-2

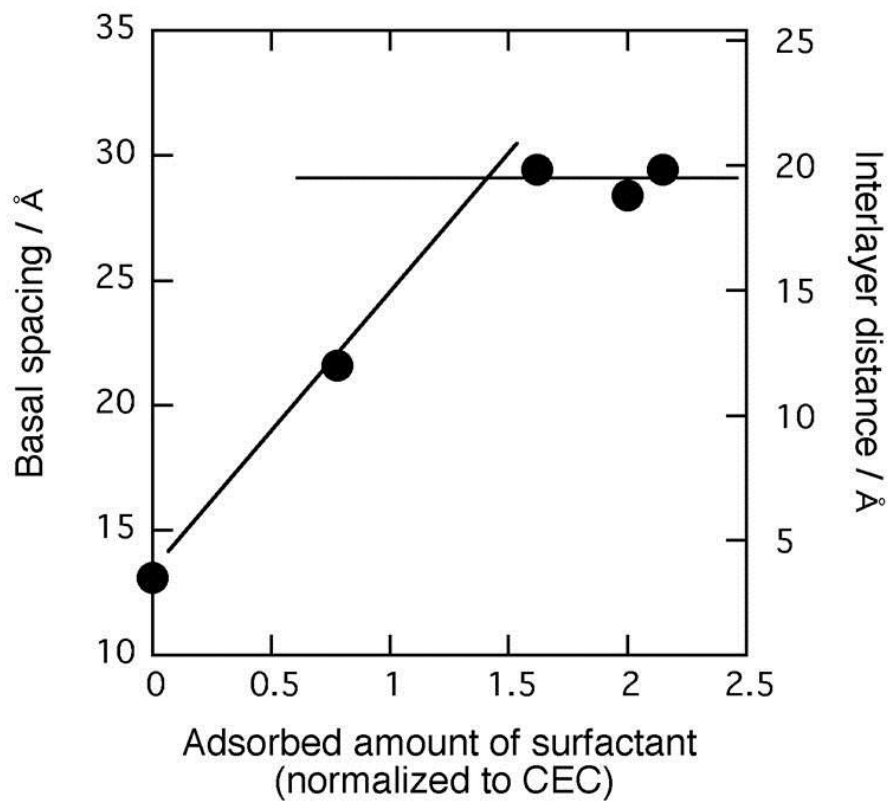

ESI-2 Maximum amount of C3F-Azo adsorbed on the clay.

ESI-3

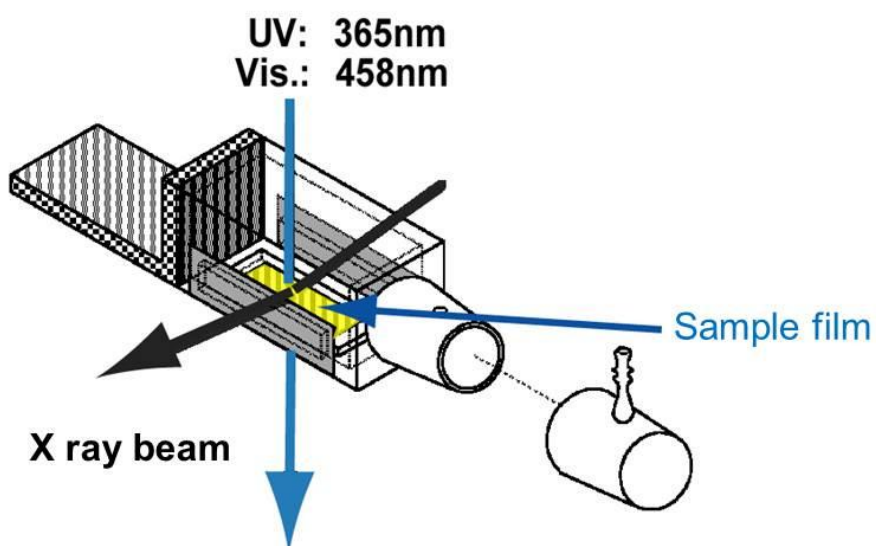

A cell specially designed for the simultaneous measurement of XRD during photoreaction.

ESI-3 Specially designed cell for simultaneous measurement of XRD during photoreaction.
